# Supplementary material for: Quantifying the arms race between LINE-1 and KRAB-zinc finger genes through TECookbook
Source: PubMed Central journal article supplement (PMC10480687; doi:10.1093/nargab/lqad078), 2023-09-06
Supplement: lqad078_supplemental_file.pdf [file lqad078_supplemental_file.pdf]

**A****UCSC genome browser tracks of PKP4 locus of hg38 genome**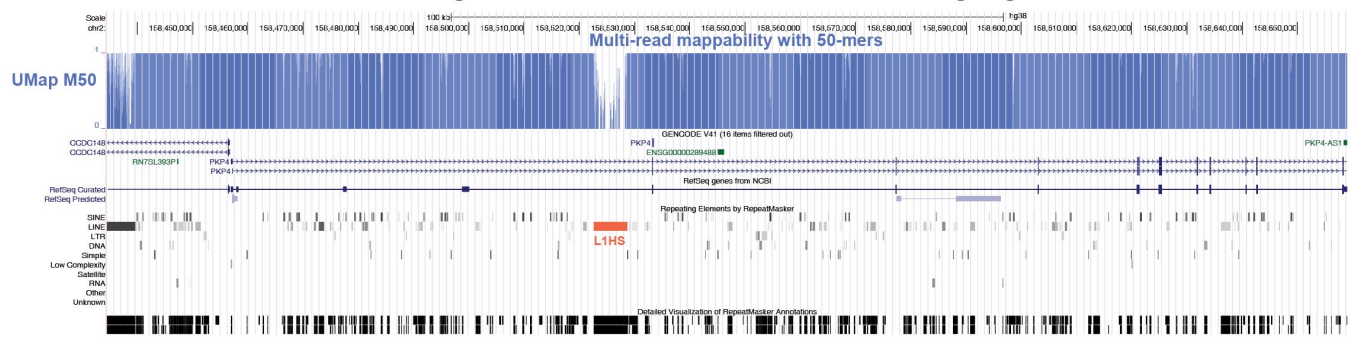**B****ENCODE ZNF382 ChIP-seq tracks of PKP4 locus of hg38 genome (ENCSR014HQD)**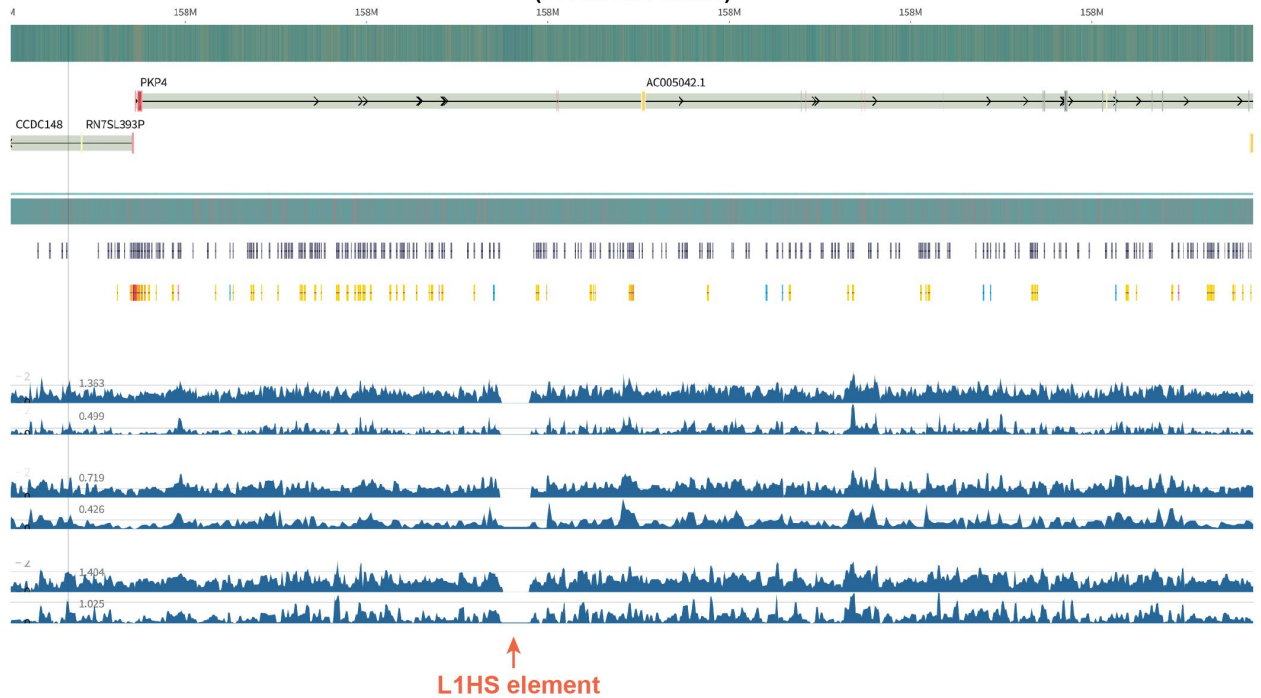**Figure S1**

- A) UCSC genome browser tracks of PKP4 locus of human genome;  
 B) ZNF382 ChIP-seq tracks of PKP4 locus produced and analyzed by ENCODE pipeline;

### UCSC repeat browser tracks for ZNF10 and ZNF382 in L1HS region

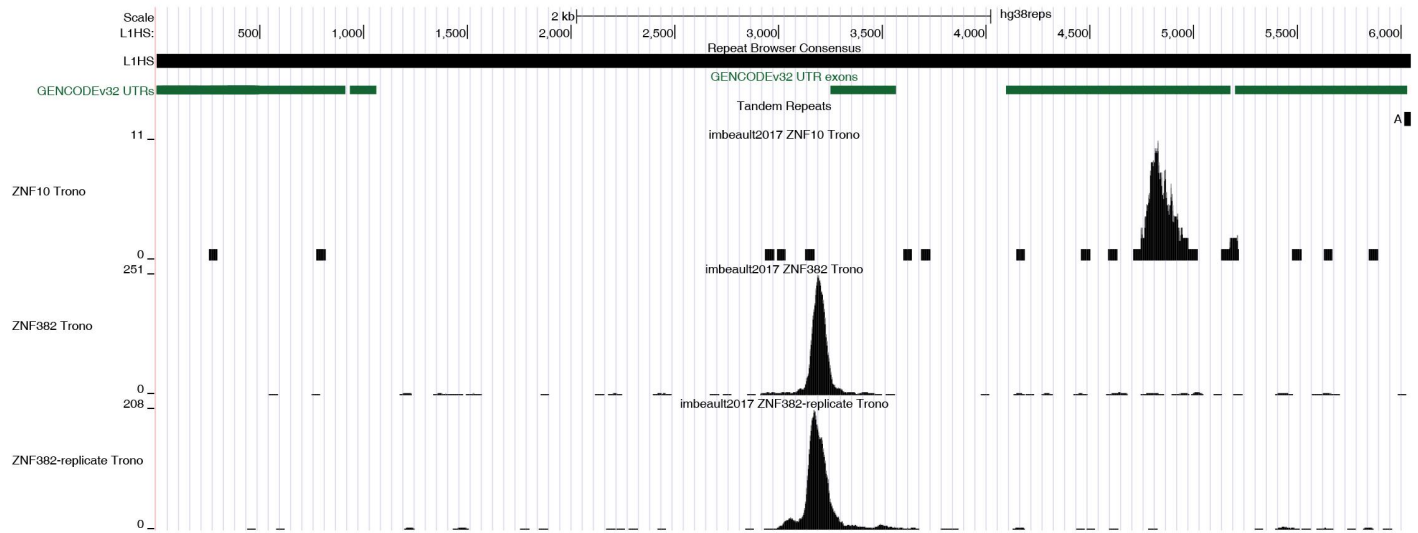

### UCSC repeat browser tracks for ZNF10 and ZNF382 in L1P3 region

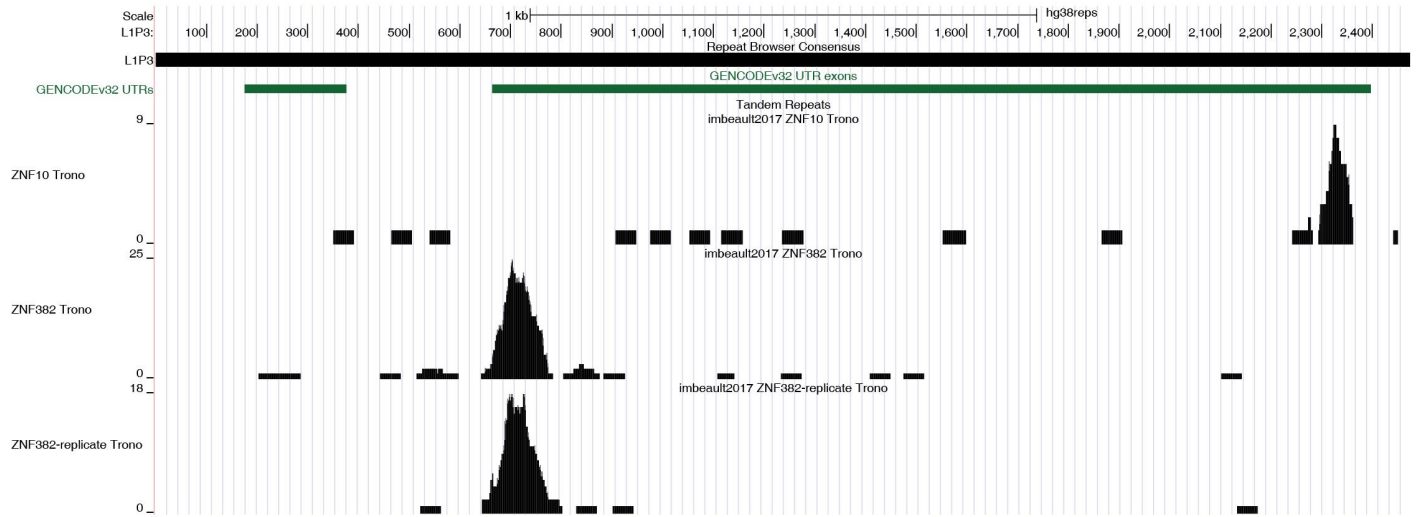

### UCSC repeat browser tracks for ZNF10 and ZNF382 in L1M4 region

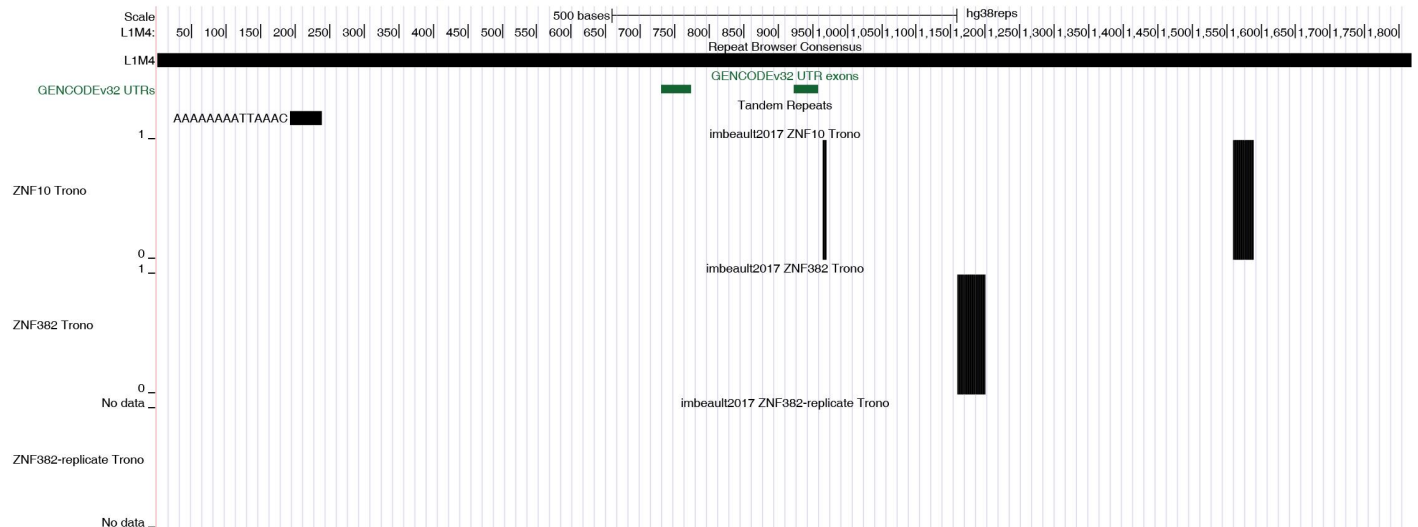

Fig. S2 UCSC repeat browser tracks for ZNF10 and ZNF382 in different LINE-1 repeats (L1HS, L1P3 and L1M4)

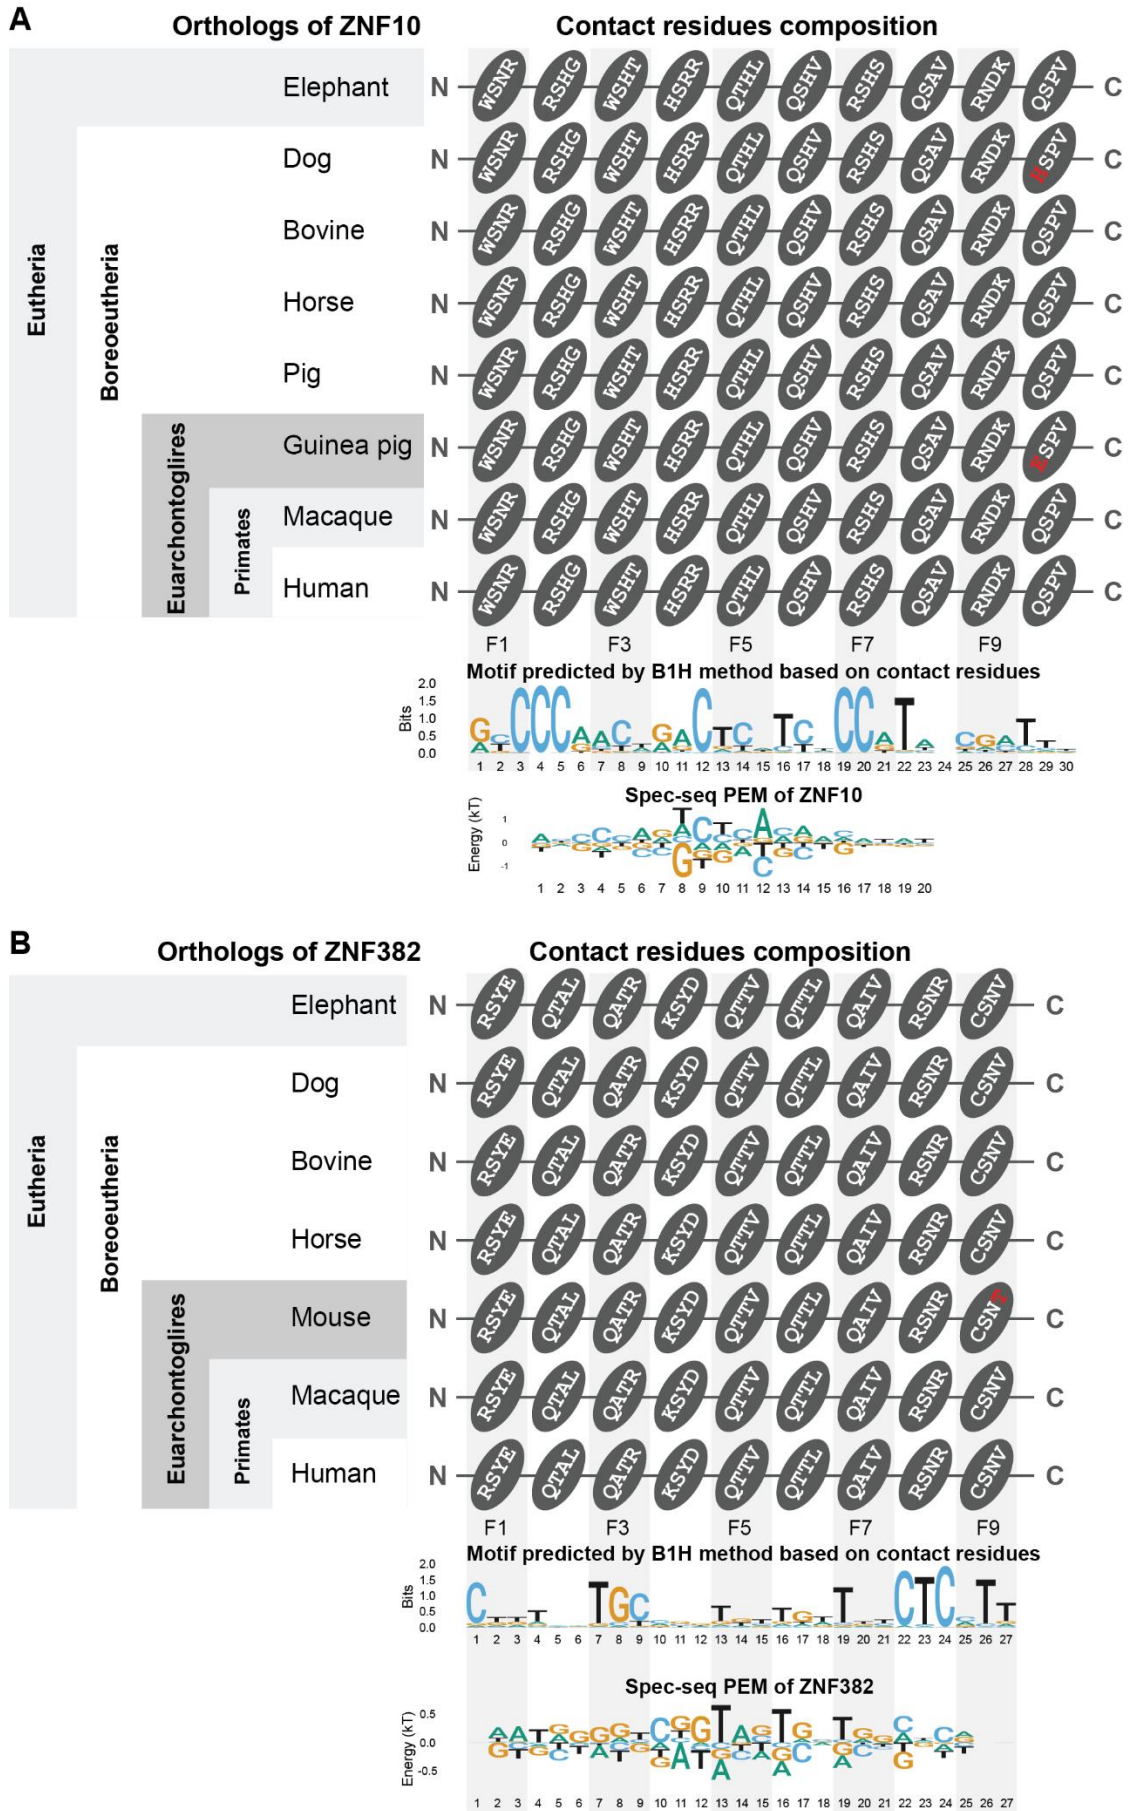

Figure S3 Contact residues composition and predicted motifs of ZNF10 and ZNF382 respectively. (Protein sequences source: NCBI gene database)

### ZNF248 ChIP-exo signals mapped along repeat coordinates

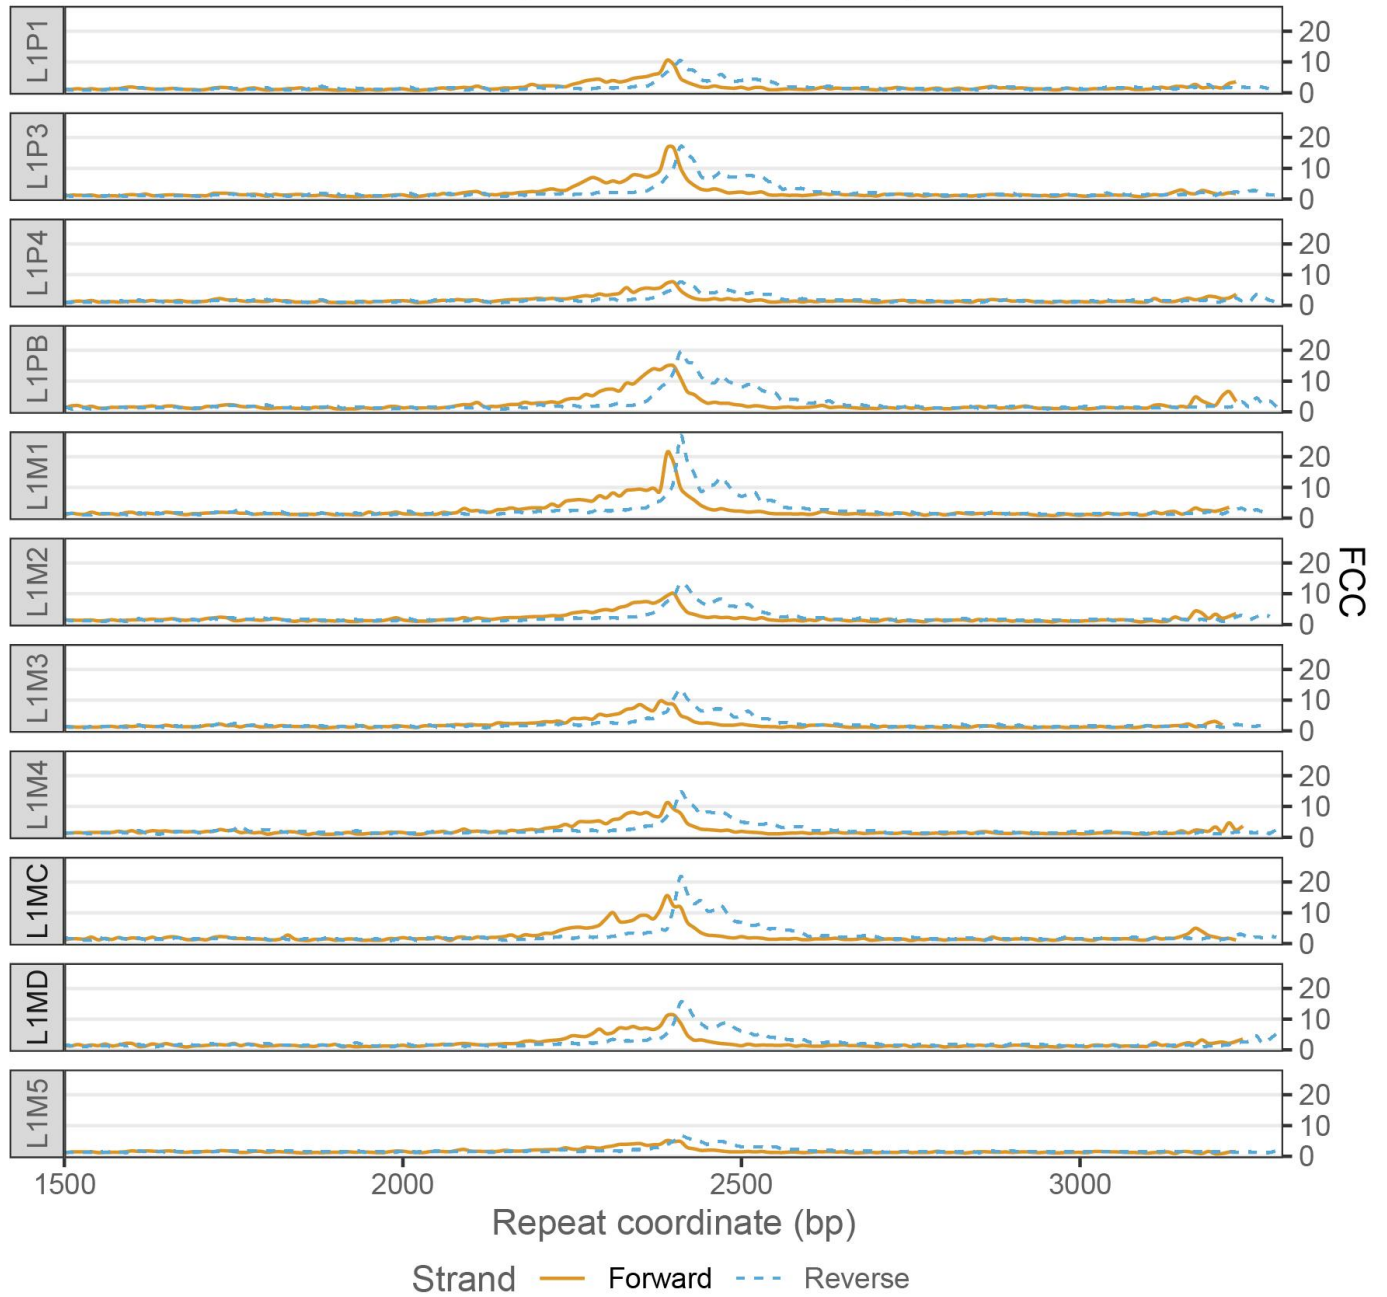

Figure S4 ZNF248 ChIP-exo signals mapped onto LINE1-ORF2 repeat tracks



### ZNF84 CHIP-exo signals mapped along repeat coordinates

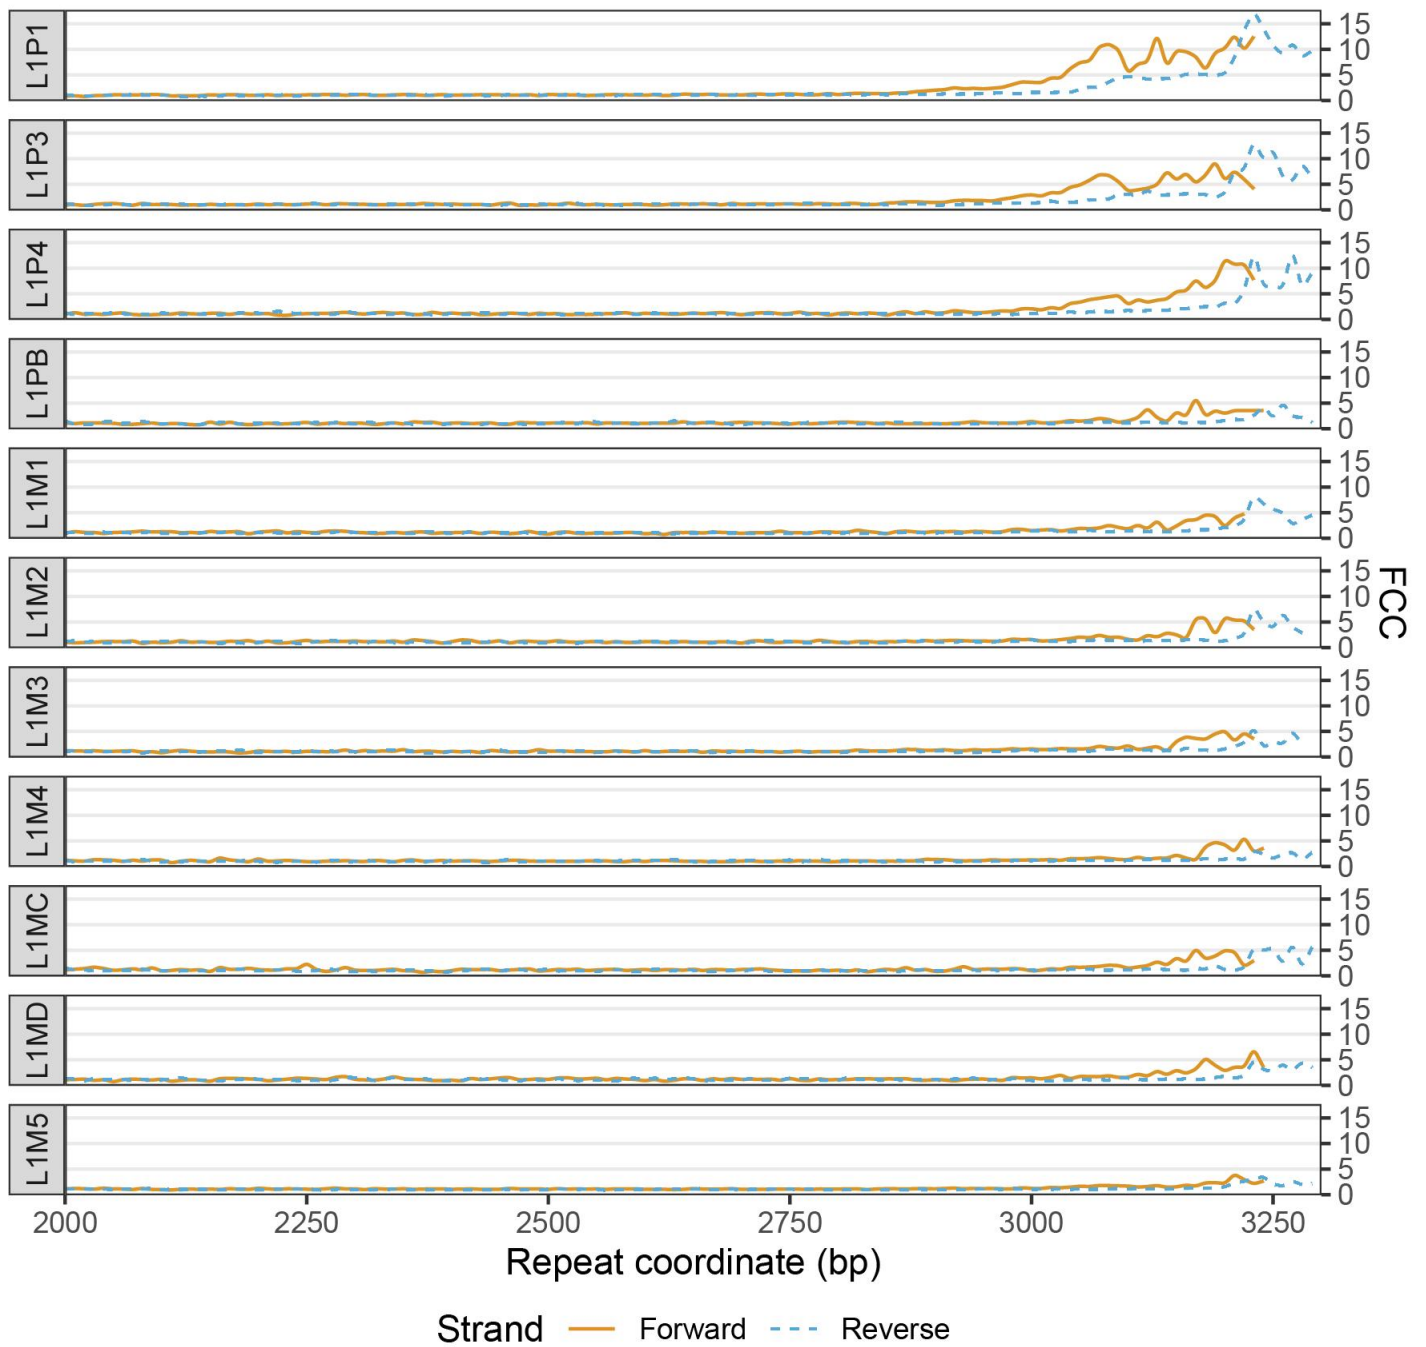

Figure S5 ZNF84 CHIP-exo signals mapped onto LINE1-ORF2 repeat tracks

### ZNF490 and ZNF250 ChIP-seq signals mapped along repeat coordinates

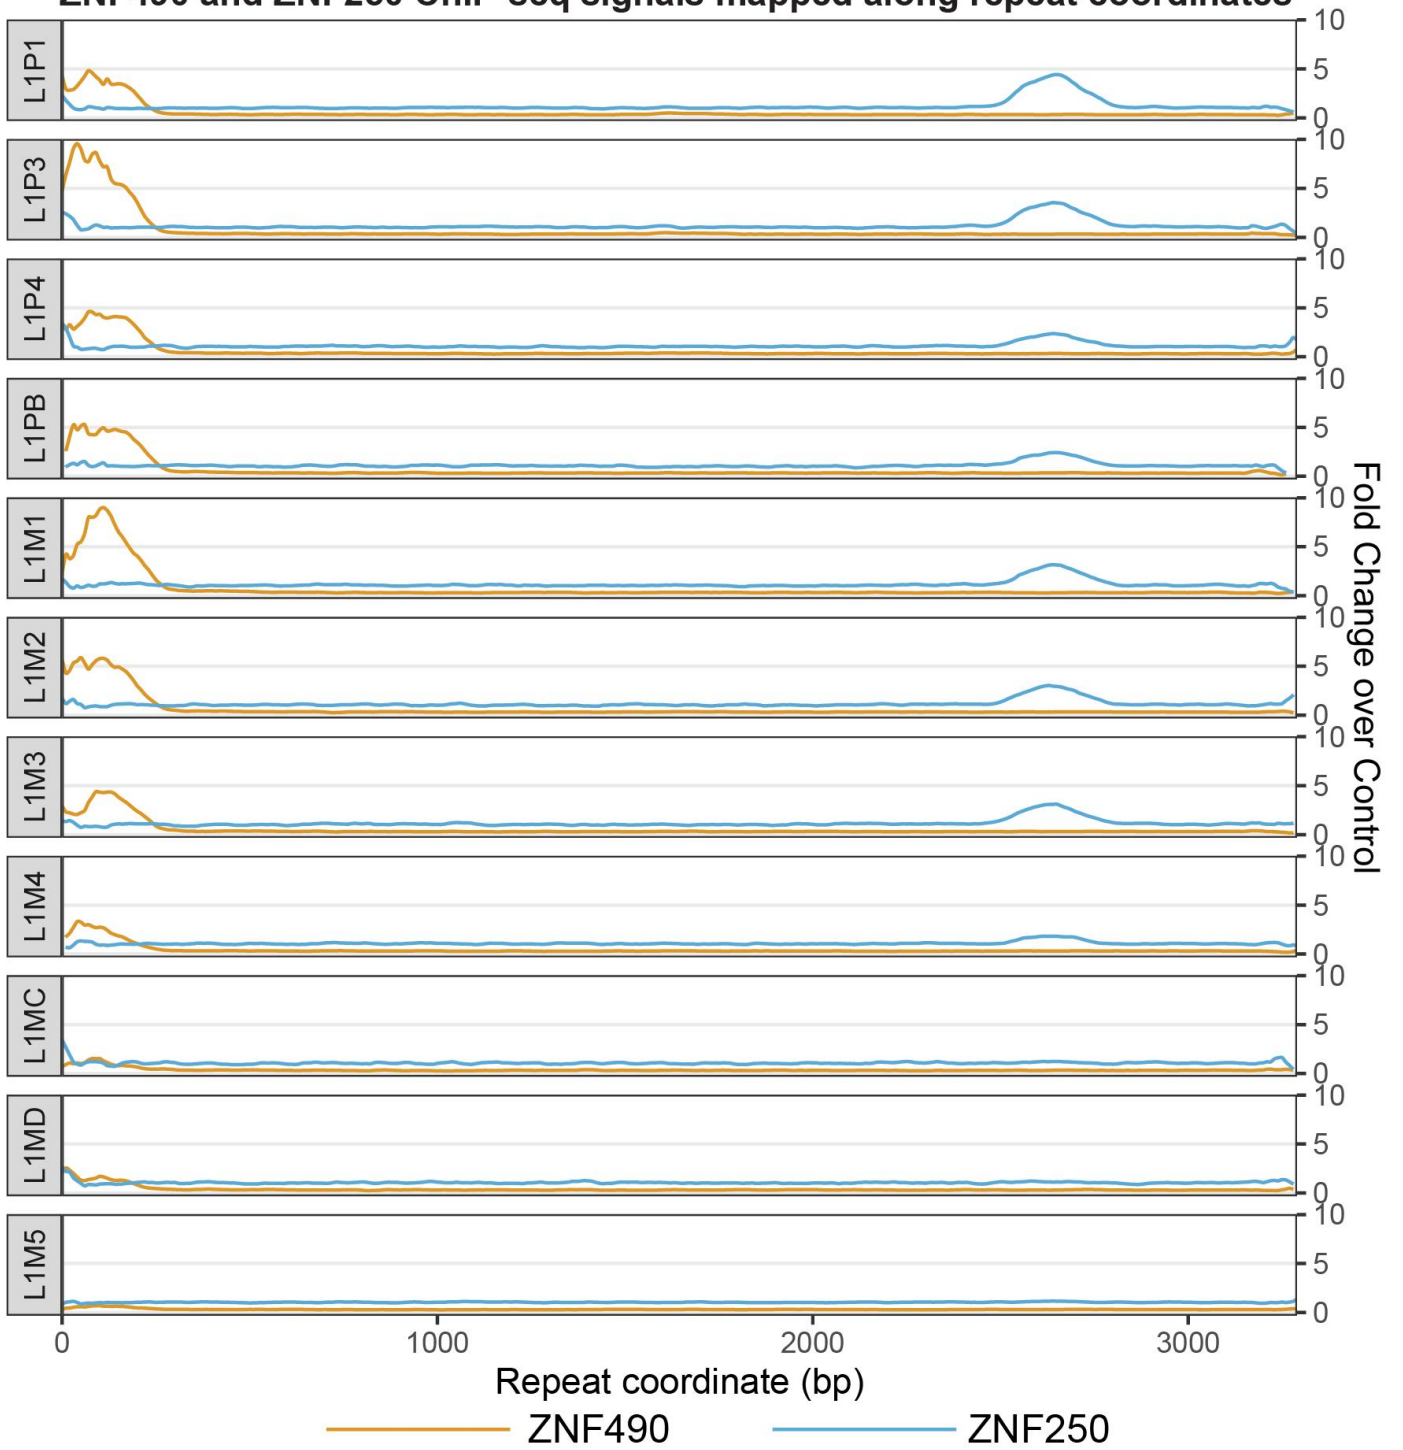

Figure S6 ZNF490 and ZNF250 ChIP-seq signals mapped onto LINE1-ORF2 repeat tracks

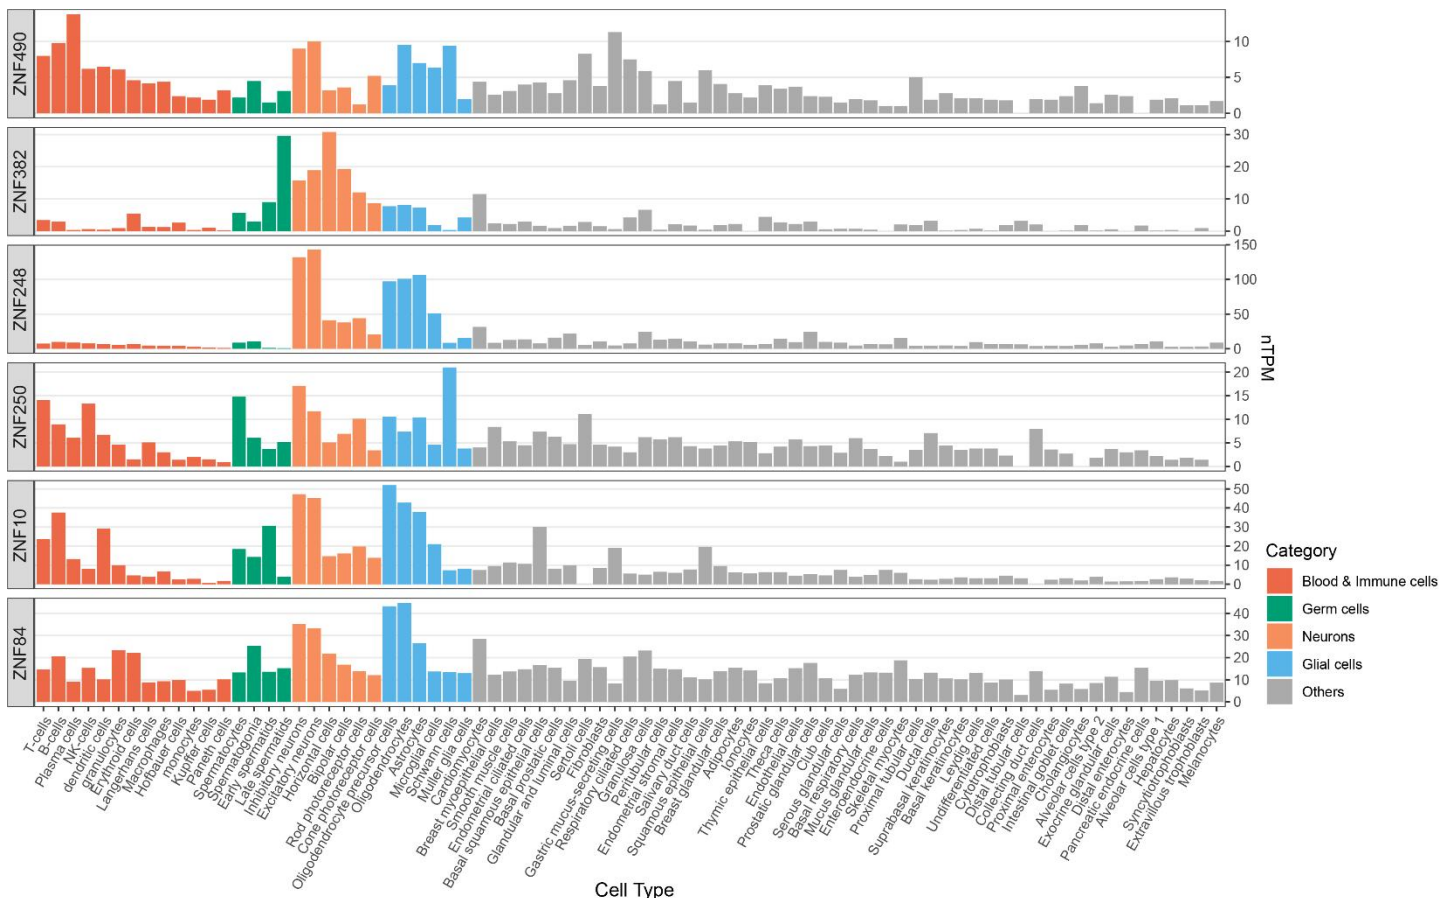

Figure S7 Expression levels of ZNFs over human cell types by Human Protein Atlas

| REAGENT or RESOURCE                                | SOURCE              | ACCESS IDENTIFIER                                                                           |
|----------------------------------------------------|---------------------|---------------------------------------------------------------------------------------------|
| <b>Software, Algorithms, and Analysis workflow</b> |                     |                                                                                             |
| MEME                                               | MEME suite          | <a href="http://meme-suite.org/">http://meme-suite.org/</a>                                 |
| TECookbook                                         | Zheng Zuo           | <a href="https://github.com/zeropin/TECookbook">https://github.com/zeropin/TECookbook</a>   |
| TFCookbook                                         | Zheng Zuo           | <a href="https://github.com/zeropin/TFCookbook">https://github.com/zeropin/TFCookbook</a>   |
| Analysis of ZNF10 and ZNF382                       | Zheng Zuo           | <a href="https://github.com/zeropin/ZFPCookbook">https://github.com/zeropin/ZFPCookbook</a> |
| <b>Data source</b>                                 |                     |                                                                                             |
| ZNF10 and ZNF382 Spec-seq data                     | Zheng Zuo           | NCBI GEO GSE189817                                                                          |
| Zinc finger motif database                         | Hughes Lab          | <a href="http://kznmotifs.cabr.utoronto.ca/">http://kznmotifs.cabr.utoronto.ca/</a>         |
| ChIP-exo data for ZNF10, 84, 248, and 382          | Trono lab           | NCBI GEO GSE78099                                                                           |
| ChIP-seq data for ZNF250 and ZNF490                | Hughes Lab          | NCBI GEO GSE76496                                                                           |
| Expression levels of ZNF382 and ZNF248             | Human Protein Atlas | <a href="https://www.proteinatlas.org">https://www.proteinatlas.org</a>                     |
| ZNF genes association with phenotypes              | GeneBass            | Genebass.org                                                                                |
| UCSC repeat browser                                | UCSC                | <a href="https://repeatbrowser.ucsc.edu/">https://repeatbrowser.ucsc.edu/</a>               |

Table S1 Key resources table
